# Supplementary material
Source: PubMed Central journal article supplement (PMC3353815)
Supplement: Supp_Data.pdf [file Supp_Data.pdf]

## Supplementary Data

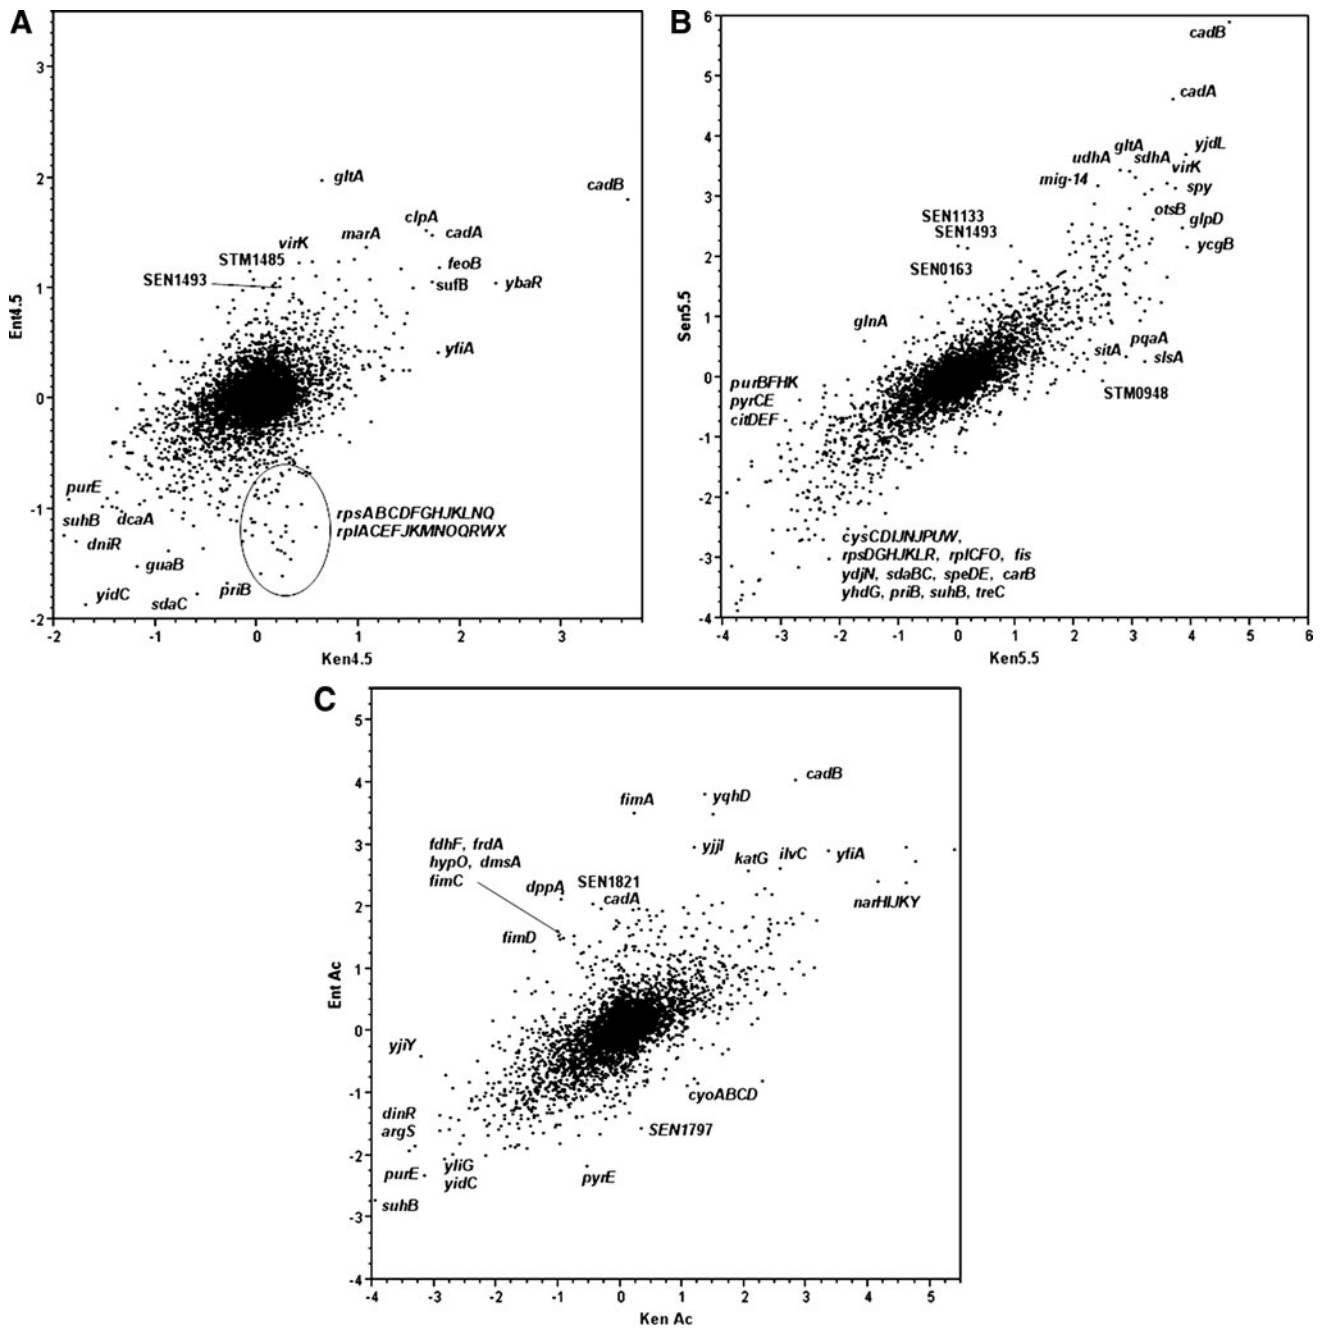

**SUPPLEMENTARY FIG. 1.** Comparison of changes in expression levels for *Salmonella enterica* Enteritidis NaI<sup>R</sup> and Kentucky 3795 upon a 10-min exposure to tryptic soy broth (TSB) medium adjusted to pH 4.5 with HCl (A); to pH 5.5 with HCl (B); and pH 5.5 with acetic acid (C). The *x*-axis and *y*-axis scales indicate log<sub>2</sub>-fold up- or down-regulation for strains Kentucky 3795 (Ken) and Enteritidis NaI<sup>R</sup> (Ent), respectively.

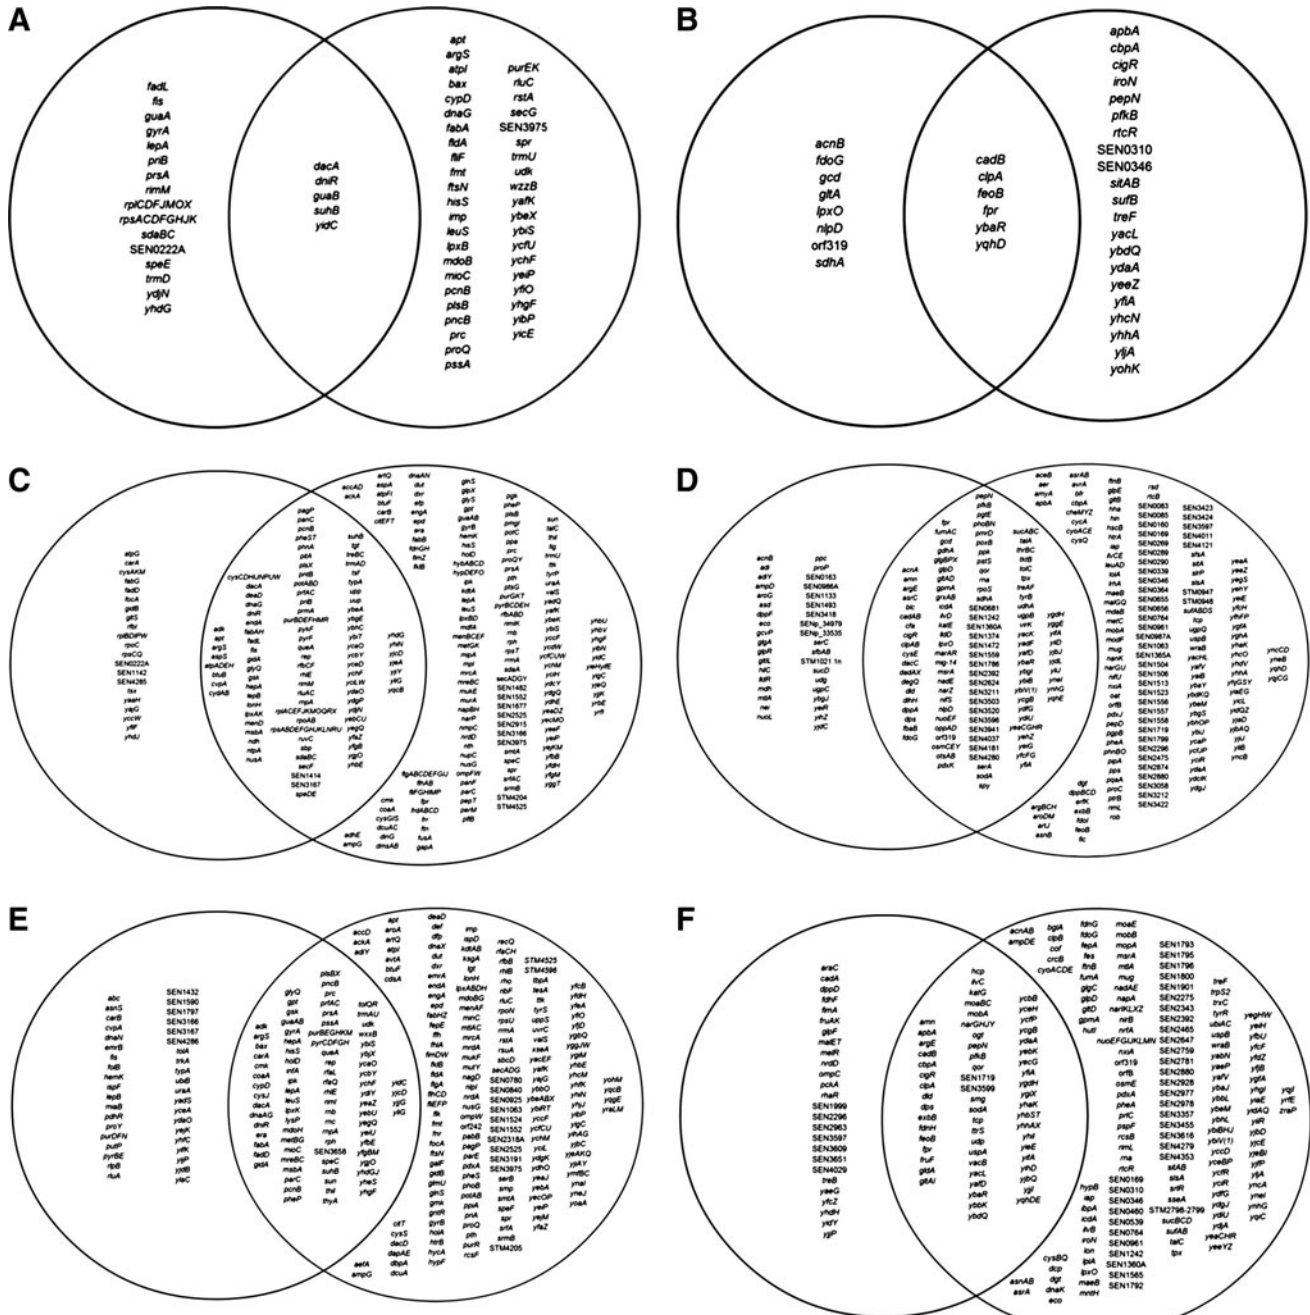

**SUPPLEMENTARY FIG. 2.** Venn diagrams for genes/loci exhibiting significant changes in expression in *Salmonella enterica* Enteritidis NaI<sup>R</sup> (right circles) and *Salmonella enterica* Kentucky 3795 (left circles). (A) Genes and loci down-regulated upon shift from neutral pH to HCl-induced pH 4.5. (B) Genes and loci up-regulated upon shift from neutral pH to HCl-induced pH 4.5. (C) Genes and loci down-regulated upon shift from neutral pH to HCl-induced pH 5.5. (D) Genes and loci up-regulated in upon shift from neutral pH to HCl-induced pH 5.5. (E) Genes and loci down-regulated upon shift from neutral pH to acetic acid-induced pH 5.5. (F) Genes and loci up-regulated upon shift from neutral pH to acetic acid-induced pH 5.5.

**SUPPLEMENTARY FIG. 3.** Comparison of  $\log_2$  changes in expression of genes/loci listed in Suppl. Table 3 as measured by quantitative polymerase chain reaction (qPCR;  $x$ -axis) with corresponding  $\log_2$  changes in expression as determined by microarray analysis ( $y$ -axis).

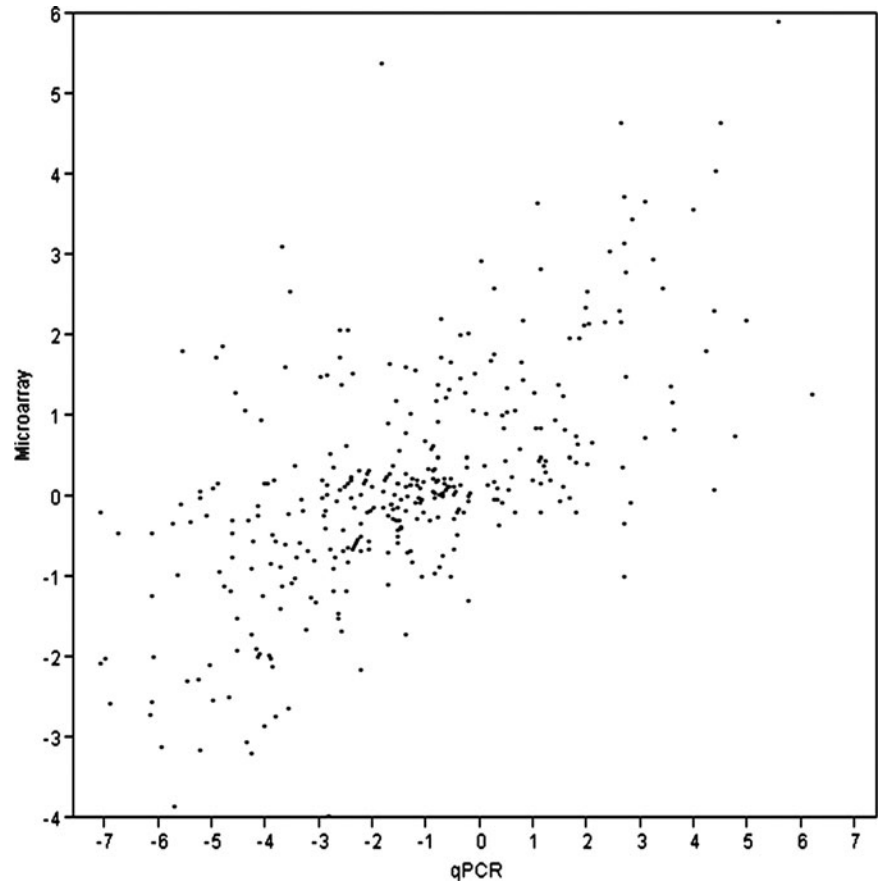

SUPPLEMENTARY TABLE 1. PRIMERS USED FOR QUANTITATIVE POLYMERASE CHAIN REACTION (qPCR) ANALYSIS

| <i>Gene or locus</i> | <i>Forward primer (5'→3')</i> | <i>Reverse primer (5'→3')</i> |
|----------------------|-------------------------------|-------------------------------|
| <i>adhE</i>          | gtggtctggatgcggtaact          | cgccatggagtgacatacac          |
| <i>adiA</i>          | aacagtccgcaggtgggta           | aattccctgcctcgggtt            |
| <i>aspA</i>          | ctgaaacgtctggcagtgaa          | tcgtaacggtggtgctgta           |
| <i>cadA</i>          | gaaccacatggcgtctact           | cagcggcatatactcgttca          |
| <i>cadB</i>          | cggcaggtattgctgtatt           | taacaatggcgtgagagtcg          |
| <i>citD</i>          | cgctcgatacgaggatatt           | cagtcagagcgcccttacc           |
| <i>citF</i>          | ctgatcgtgcaaatcgaaga          | cagggagaaccttcgttga           |
| <i>clpB</i>          | cgactgaacctttgcgaca           | ctfgatcgftcacgcttca           |
| <i>cyoA</i>          | ttgcaggcactgcattactc          | gtgtgaccagttcgggctat          |
| <i>dcuA</i>          | ctggtgatgtccttctggt           | gggtttcatcagcggttct           |
| <i>dmsA</i>          | gcggaacatgtcttacgtt           | tgacgcatccactcttctg           |
| <i>fdhF</i>          | gtggtcgataacggcaaaa           | ctcaaacgttcagcagcga           |
| <i>fimC</i>          | tattatctacccgggcaac           | acacgggaaaattcagcaa           |
| <i>fimD</i>          | cacaatctccgctacagcaa          | acttatgccttccatccac           |
| <i>flgD</i>          | attggacatggcgttatggt          | ccatcccaggtaaaagggtg          |
| <i>fliG</i>          | ggcggaaattatcaactga           | ggacatattgcgcaggaact          |
| <i>glmU</i>          | acctgaaacgtggtgtct            | cctgttcggcctggtaaata          |
| <i>gltA</i>          | ttcggtaaccgtgtttacaa          | ctcgtgaagtacgggtcgt           |
| <i>guaB</i>          | cagatcaccgctgtttctga          | tgtagaacggccctggtag           |
| <i>hypB</i>          | gatctgggcgaaaagcataa          | tcaatctcggggttcacttc          |
| <i>hypO</i>          | aaactccgcttcagagaaa           | tattctcccgtgagtcagc           |
| <i>katG</i>          | gaaaccgaccgacgaatcta          | cggtccaggttcatcacttt          |
| <i>malT</i>          | caccctgttttgtagctt            | ggcagcgttttaatgactc           |
| <i>narG</i>          | gccagcttctcgaacaaa            | ggttgcctgtttccagggt           |
| <i>oppD</i>          | ttattgccgatgagcctacc          | ggatgaacgggctgataaaa          |
| <i>osmC</i>          | gatttacccgacatccatt           | attccgcattcagaacctg           |
| <i>pitA</i>          | actgaattccactgccatcc          | ccaggcaatttcacgacttt          |
| <i>priB</i>          | cgaagggtcagtcacatcagg         | tgcagaaccattttgtcag           |
| <i>rplC</i>          | agctaaccgtgtcaccaagc          | ttaacggtaccagcgaaac           |
| <i>rpoN</i>          | gcgacagtattccccgttca          | gccagtaccatcggtttcat          |
| <i>rpoS</i>          | gcgactcagctttacctgg           | gggtcaacttctcgactgc           |
| <i>rpsC</i>          | ggaaactggctaaagcgtctg         | ccagctgagaagtgatgctg          |
| <i>secY</i>          | tgggatcatgcccgtatatt          | aagcctggattcatcaccag          |
| <i>sipA</i>          | aagatggaaagggtggtcagc         | ttcaaatctctccgctctg           |
| <i>sipB</i>          | gtgggcaaaaatacgaaga           | cccgatacatcccataatgc          |
| <i>sitA</i>          | actcctgattcccgtattg           | ccctgcgctgttataatc            |
| <i>sopB</i>          | taacgtcaatggcaaaccaa          | tgccagggtggttattaag           |
| <i>spy</i>           | gcgcaaatcagaaaatgga           | gcagcaggcattttaccttc          |
| <i>suhB</i>          | tcaaacgtctgccacacttc          | gtcgcgtattgtttggcttt          |
| <i>thrA</i>          | gacgatctttccggtatgga          | cccacatagcgaatacctt           |
| <i>treB</i>          | ttctgccccacactttatc           | atcgatagcagcgttgtct           |
| <i>uvrC</i>          | ttttgtccgtaaggacgac           | cacttaccctggcgaataa           |
| SEN1493              | atgagctgccaggagtttgt          | tcactctcggggtttttctt          |
| SEN0629              | tgcgagaatttgtttatgc           | tcggttgttttctgtacc            |
| SEN1821              | tacagagcagtggcgatacg          | gctttacgcgcactatcaca          |
| SEN1800              | ggatcagacgactggtattt          | cgctttggtttgctttcta           |
| SEN1796              | taaccggctggtttttgtct          | atcgttgccgacaggataac          |
| SEN1795              | catctgtgttgcgggatg            | acagagtgtcgggtaatcg           |
| SEN1793              | aaccggctggacagacatac          | gctgtaccatctgcgtctca          |
| STM1485              | gtctctctccgagcattc            | agtgtgtttgacggggttt           |
| -Ent                 |                               |                               |
| STM1485              | gtctctctccgagcattc            | gtagatttggctgggcttt           |
| -Ken                 |                               |                               |
| SEN1242              | gtcaccggtaagcctatcca          | gtcgcgggtatgatcctgaat         |
| SEN2343              | gttatcgaatcggcaggaa           | cgcttgcctcattgatgat           |
| SEN2624              | tgggtgtcgtgtcgaattta          | gattgtctccgtaaggaca           |
| SEN2977              | ctgtcccgtagctcgttag           | tttcagtcgatgacatcca           |
| SEN3609              | attttcgtcaacccaactc           | tgcgtgataaacggtttcaa          |
| SEN3651              | gaaatggaaagccagatgga          | cgcttaaaggcatggatgat          |
| SEN3847              | gatgatcccgatgctgaac           | taaagcgggtatcggcaaac          |
| SEN3894              | gtctctctcgtgtggttc            | gattaacggcgacacctgt           |
| SEN4029              | gcacccttcttaagcaat            | gcaagcaatgcgagttcttt          |

















**U. Transcription**

|         |         |             |                                    |       |       |       |       |       |       |       |       |       |       |       |       |
|---------|---------|-------------|------------------------------------|-------|-------|-------|-------|-------|-------|-------|-------|-------|-------|-------|-------|
| SEN3243 | STM3415 | <i>rpoA</i> | RNA polymerase, alpha subunit      | -0.89 | 0.001 | -0.03 | 0.749 | -1.57 | 0.000 | -1.96 | 0.000 | -0.26 | 0.071 | -0.12 | 0.397 |
| SEN3937 | STM4153 | <i>rpoB</i> | RNA polymerase, beta subunit       | -0.68 | 0.000 | 0.00  | 0.983 | -1.43 | 0.000 | -1.58 | 0.000 | -0.58 | 0.000 | -0.28 | 0.001 |
| SEN3938 | STM4154 | <i>rpoC</i> | RNA polymerase, beta prime subunit | 0.00  | 0.967 | 0.42  | 0.001 | -1.27 | 0.000 | -0.69 | 0.003 | 0.15  | 0.143 | 0.24  | 0.043 |

---

<sup>1</sup> Empty cells indicate that no locus is present or that no gene designation has been assigned

<sup>2</sup> Framed numbers are significant (2-fold up- or down-regulated; p<0.001)

<sup>3</sup> Framed numbers are significant (2-fold up- or down-regulated;....)

Supplementary Table 3. Relative mRNA Levels Determined by Quantitative Polymerase Chain Reaction (qPCR)<sup>1</sup>

| Gene or locus              | Ent 7 <sup>2</sup>  | Ent 4.5            | Ent 5.5            | Ent Ac             | Ken 7               | Ken 4.5              | Ken 5.5            | Ken Ac              |
|----------------------------|---------------------|--------------------|--------------------|--------------------|---------------------|----------------------|--------------------|---------------------|
| <i>adhE</i>                | 5903 <sup>bc</sup>  | 4359 <sup>bc</sup> | 389 <sup>c</sup>   | 8264 <sup>ab</sup> | 13667 <sup>a</sup>  | 3153 <sup>bc</sup>   | 525 <sup>c</sup>   | 2910 <sup>bc</sup>  |
| <i>adiA</i>                | 10 <sup>bc</sup>    | 4 <sup>c</sup>     | 17 <sup>b</sup>    | 4 <sup>b</sup>     | 28 <sup>a</sup>     | 5 <sup>b</sup>       | 16 <sup>b</sup>    | 9 <sup>b</sup>      |
| <i>aspA</i>                | 1384 <sup>b</sup>   | 751 <sup>b</sup>   | 78 <sup>b</sup>    | 1268 <sup>b</sup>  | 4923 <sup>a</sup>   | 1529 <sup>b</sup>    | 301 <sup>b</sup>   | 826 <sup>b</sup>    |
| <i>cadA</i>                | 259 <sup>c</sup>    | 201 <sup>c</sup>   | 5835 <sup>b</sup>  | 827 <sup>c</sup>   | 927 <sup>c</sup>    | 151 <sup>c</sup>     | 7807 <sup>a</sup>  | 478 <sup>c</sup>    |
| <i>cadB</i>                | 119 <sup>c</sup>    | 2185 <sup>b</sup>  | 5578 <sup>a</sup>  | 2520 <sup>b</sup>  | 755 <sup>bc</sup>   | 1571 <sup>bc</sup>   | 4666 <sup>a</sup>  | 1629 <sup>bc</sup>  |
| <i>citD</i>                | 174 <sup>b</sup>    | 12 <sup>b</sup>    | 7 <sup>b</sup>     | 24 <sup>b</sup>    | 3728 <sup>a</sup>   | 98 <sup>b</sup>      | 27 <sup>b</sup>    | 74 <sup>b</sup>     |
| <i>citF</i>                | 484 <sup>b</sup>    | 16 <sup>b</sup>    | 9 <sup>b</sup>     | 91 <sup>b</sup>    | 2390 <sup>a</sup>   | 63 <sup>b</sup>      | 54 <sup>b</sup>    | 94 <sup>b</sup>     |
| <i>clpB</i>                | 341 <sup>b</sup>    | 2848 <sup>a</sup>  | 474 <sup>b</sup>   | 1016 <sup>ab</sup> | 570 <sup>b</sup>    | 950 <sup>ab</sup>    | 376 <sup>b</sup>   | 440 <sup>b</sup>    |
| <i>cyoA</i>                | 954 <sup>a</sup>    | 486 <sup>a</sup>   | 643 <sup>a</sup>   | 389 <sup>a</sup>   | 35 <sup>a</sup>     | 712 <sup>a</sup>     | 543 <sup>a</sup>   | 720 <sup>a</sup>    |
| <i>dcuA</i>                | 575 <sup>b</sup>    | 316 <sup>b</sup>   | 44 <sup>b</sup>    | 311 <sup>b</sup>   | 2016 <sup>a</sup>   | 328 <sup>b</sup>     | 168 <sup>b</sup>   | 174 <sup>b</sup>    |
| <i>dmsA</i>                | 499 <sup>ab</sup>   | 140 <sup>b</sup>   | 18 <sup>b</sup>    | 467 <sup>b</sup>   | 1085 <sup>a</sup>   | 139 <sup>b</sup>     | 52 <sup>b</sup>    | 99 <sup>b</sup>     |
| <i>fdhF</i>                | 105 <sup>ab</sup>   | 48 <sup>b</sup>    | 15 <sup>b</sup>    | 40 <sup>b</sup>    | 231 <sup>a</sup>    | 33 <sup>b</sup>      | 24 <sup>b</sup>    | 21 <sup>b</sup>     |
| <i>fimC</i>                | 291 <sup>b</sup>    | 67 <sup>d</sup>    | 120 <sup>cd</sup>  | 48 <sup>d</sup>    | 511 <sup>a</sup>    | 67 <sup>d</sup>      | 175 <sup>c</sup>   | 78 <sup>cd</sup>    |
| <i>fimD</i>                | 145 <sup>b</sup>    | 12 <sup>c</sup>    | 49 <sup>c</sup>    | 6 <sup>c</sup>     | 337 <sup>a</sup>    | 19 <sup>c</sup>      | 64 <sup>bc</sup>   | 25 <sup>c</sup>     |
| <i>flgD</i>                | 2090 <sup>b</sup>   | 426 <sup>b</sup>   | 240 <sup>b</sup>   | 278 <sup>b</sup>   | 5785 <sup>a</sup>   | 2070 <sup>b</sup>    | 394 <sup>b</sup>   | 1755 <sup>b</sup>   |
| <i>fliG</i>                | 739 <sup>b</sup>    | 133 <sup>b</sup>   | 78 <sup>b</sup>    | 55 <sup>b</sup>    | 2061 <sup>a</sup>   | 279 <sup>b</sup>     | 134 <sup>b</sup>   | 401 <sup>b</sup>    |
| <i>glum</i>                | 1161 <sup>a</sup>   | 348 <sup>b</sup>   | 510 <sup>b</sup>   | 263 <sup>b</sup>   | 1111 <sup>a</sup>   | 195 <sup>b</sup>     | 428 <sup>b</sup>   | 418 <sup>b</sup>    |
| <i>gltA</i>                | 95 <sup>c</sup>     | 342 <sup>b</sup>   | 681 <sup>a</sup>   | 163 <sup>bc</sup>  | 61 <sup>c</sup>     | 213 <sup>bc</sup>    | 572 <sup>a</sup>   | 168 <sup>bc</sup>   |
| <i>guaB</i>                | 1671 <sup>b</sup>   | 262 <sup>c</sup>   | 86 <sup>c</sup>    | 93 <sup>c</sup>    | 5035 <sup>a</sup>   | 748 <sup>bc</sup>    | 259 <sup>c</sup>   | 1063 <sup>bc</sup>  |
| <i>hypB</i>                | 2689 <sup>ab</sup>  | 840 <sup>b</sup>   | 241 <sup>b</sup>   | 2288 <sup>ab</sup> | 5116 <sup>a</sup>   | 902 <sup>b</sup>     | 361 <sup>b</sup>   | 649 <sup>b</sup>    |
| <i>hypO</i>                | 590 <sup>b</sup>    | 201 <sup>c</sup>   | 35 <sup>c</sup>    | 81 <sup>c</sup>    | 1987 <sup>a</sup>   | 120 <sup>c</sup>     | 52 <sup>c</sup>    | 68 <sup>c</sup>     |
| <i>katG</i>                | 184 <sup>ab</sup>   | 99 <sup>ab</sup>   | 43 <sup>b</sup>    | 219 <sup>a</sup>   | 222 <sup>a</sup>    | 85 <sup>ab</sup>     | 184 <sup>ab</sup>  | 36 <sup>b</sup>     |
| <i>malT</i>                | 0.1 <sup>a</sup>    | 0.2 <sup>a</sup>   | 0.03 <sup>a</sup>  | 0.06 <sup>a</sup>  | 2 <sup>a</sup>      | 0.3 <sup>a</sup>     | 0.3 <sup>a</sup>   | 3 <sup>a</sup>      |
| <i>narG</i>                | 13456 <sup>a</sup>  | 4778 <sup>a</sup>  | 780 <sup>a</sup>   | 13540 <sup>a</sup> | 14301 <sup>a</sup>  | 4351 <sup>a</sup>    | 1104 <sup>a</sup>  | 3937 <sup>a</sup>   |
| <i>oppD</i>                | 303 <sup>b</sup>    | 219 <sup>bc</sup>  | 872 <sup>a</sup>   | 205 <sup>bc</sup>  | 96 <sup>cd</sup>    | 28 <sup>d</sup>      | 151 <sup>cd</sup>  | 33 <sup>d</sup>     |
| <i>osmC</i>                | 46 <sup>b</sup>     | 91 <sup>b</sup>    | 541 <sup>a</sup>   | 145 <sup>b</sup>   | 49 <sup>b</sup>     | 35 <sup>b</sup>      | 519 <sup>a</sup>   | 33 <sup>b</sup>     |
| <i>pitA</i>                | 367 <sup>ab</sup>   | 87 <sup>c</sup>    | 21 <sup>c</sup>    | 19 <sup>c</sup>    | 455 <sup>a</sup>    | 97 <sup>c</sup>      | 32 <sup>c</sup>    | 213 <sup>bc</sup>   |
| <i>priB</i>                | 39426 <sup>a</sup>  | 6471 <sup>bc</sup> | 632 <sup>c</sup>   | 2672 <sup>bc</sup> | 41909 <sup>a</sup>  | 14715 <sup>abc</sup> | 801 <sup>bc</sup>  | 29586 <sup>ab</sup> |
| <i>rplC</i>                | 117453 <sup>a</sup> | 18760 <sup>b</sup> | 907 <sup>b</sup>   | 11495 <sup>b</sup> | 74449 <sup>ab</sup> | 15563 <sup>b</sup>   | 4915 <sup>b</sup>  | 24311 <sup>b</sup>  |
| <i>rpoN</i>                | 754 <sup>b</sup>    | 76 <sup>b</sup>    | 404 <sup>b</sup>   | 161 <sup>b</sup>   | 1989 <sup>a</sup>   | 79 <sup>b</sup>      | 425 <sup>b</sup>   | 223 <sup>b</sup>    |
| <i>rpoS</i>                | 2094 <sup>b</sup>   | 5488 <sup>b</sup>  | 12800 <sup>a</sup> | 7204 <sup>ab</sup> | 1945 <sup>b</sup>   | 4252 <sup>b</sup>    | 7510 <sup>ab</sup> | 3949 <sup>b</sup>   |
| <i>rpsC</i>                | 21608 <sup>ab</sup> | 18327 <sup>b</sup> | 647 <sup>d</sup>   | 7348 <sup>cd</sup> | 29636 <sup>a</sup>  | 16418 <sup>bc</sup>  | 1275 <sup>d</sup>  | 16899 <sup>bc</sup> |
| <i>secY</i>                | 9597 <sup>a</sup>   | 5270 <sup>b</sup>  | 138 <sup>d</sup>   | 2328 <sup>c</sup>  | 363 <sup>d</sup>    | 237 <sup>d</sup>     | 3 <sup>d</sup>     | 316 <sup>d</sup>    |
| <i>SEN1493</i>             | 183 <sup>b</sup>    | 241 <sup>b</sup>   | 741 <sup>a</sup>   | 246 <sup>b</sup>   | 21 <sup>b</sup>     | 13 <sup>b</sup>      | 13 <sup>b</sup>    | 15 <sup>b</sup>     |
| <i>sipA</i>                | 337 <sup>a</sup>    | 198 <sup>b</sup>   | 160 <sup>b</sup>   | 146 <sup>bc</sup>  | 81 <sup>cd</sup>    | 15 <sup>d</sup>      | 26 <sup>d</sup>    | 15 <sup>d</sup>     |
| <i>sipB</i>                | 434 <sup>bc</sup>   | 620 <sup>a</sup>   | 322 <sup>c</sup>   | 494 <sup>ab</sup>  | 47 <sup>d</sup>     | 14 <sup>d</sup>      | 16 <sup>d</sup>    | 19 <sup>d</sup>     |
| <i>sitA</i>                | 19 <sup>c</sup>     | 516 <sup>a</sup>   | 76 <sup>c</sup>    | 232 <sup>bc</sup>  | 6 <sup>c</sup>      | 442 <sup>ab</sup>    | 30 <sup>c</sup>    | 186 <sup>c</sup>    |
| <i>sopB</i>                | 658 <sup>a</sup>    | 419 <sup>b</sup>   | 313 <sup>c</sup>   | 201 <sup>d</sup>   | 16 <sup>e</sup>     | 21 <sup>e</sup>      | 7 <sup>e</sup>     | 5 <sup>e</sup>      |
| <i>spy</i>                 | 11 <sup>b</sup>     | 38 <sup>b</sup>    | 70 <sup>ab</sup>   | 13 <sup>b</sup>    | 25 <sup>b</sup>     | 58 <sup>b</sup>      | 161 <sup>a</sup>   | 54 <sup>b</sup>     |
| <i>SEN0629</i>             | 55 <sup>bc</sup>    | 38 <sup>bc</sup>   | 13 <sup>c</sup>    | 21 <sup>c</sup>    | 329 <sup>a</sup>    | 101 <sup>b</sup>     | 20 <sup>c</sup>    | 47 <sup>bc</sup>    |
| <i>SEN1821</i>             | 84 <sup>b</sup>     | 27 <sup>b</sup>    | 14 <sup>b</sup>    | 15 <sup>b</sup>    | 224 <sup>a</sup>    | 11 <sup>b</sup>      | 18 <sup>b</sup>    | 9 <sup>b</sup>      |
| <i>SEN1800</i>             | 8 <sup>b</sup>      | 18 <sup>b</sup>    | 10 <sup>b</sup>    | 10 <sup>b</sup>    | 44 <sup>b</sup>     | 187 <sup>a</sup>     | 93 <sup>ab</sup>   | 166 <sup>a</sup>    |
| <i>SEN1796</i>             | 5929 <sup>a</sup>   | 309 <sup>a</sup>   | 54 <sup>a</sup>    | 194 <sup>a</sup>   | 1688 <sup>a</sup>   | 217 <sup>a</sup>     | 108 <sup>a</sup>   | 142 <sup>a</sup>    |
| <i>SEN1795</i>             | 299 <sup>b</sup>    | 29 <sup>b</sup>    | 7 <sup>b</sup>     | 24 <sup>b</sup>    | 1247 <sup>a</sup>   | 39 <sup>b</sup>      | 9 <sup>b</sup>     | 26 <sup>b</sup>     |
| <i>SEN1793</i>             | 1779 <sup>b</sup>   | 25 <sup>b</sup>    | 37 <sup>b</sup>    | 85 <sup>b</sup>    | 590 <sup>a</sup>    | 33 <sup>b</sup>      | 17 <sup>b</sup>    | 21 <sup>b</sup>     |
| <i>STM1485<sup>3</sup></i> | 10 <sup>c</sup>     | 119 <sup>b</sup>   | 29 <sup>c</sup>    | 11 <sup>c</sup>    | 22 <sup>c</sup>     | 152 <sup>a</sup>     | 30 <sup>c</sup>    | 26 <sup>c</sup>     |
| <i>SEN1242</i>             | 72 <sup>c</sup>     | 229 <sup>c</sup>   | 286 <sup>bc</sup>  | 157 <sup>c</sup>   | 87 <sup>c</sup>     | 543 <sup>ab</sup>    | 567 <sup>a</sup>   | 564 <sup>a</sup>    |
| <i>SEN2343</i>             | 92 <sup>ab</sup>    | 142 <sup>ab</sup>  | 23 <sup>b</sup>    | 159 <sup>ab</sup>  | 255 <sup>a</sup>    | 267 <sup>a</sup>     | 44 <sup>b</sup>    | 154 <sup>ab</sup>   |
| <i>SEN2624</i>             | 21 <sup>b</sup>     | 11 <sup>b</sup>    | 127 <sup>a</sup>   | 16 <sup>b</sup>    | 29 <sup>b</sup>     | 11 <sup>b</sup>      | 155 <sup>a</sup>   | 24 <sup>b</sup>     |
| <i>SEN2977</i>             | 16 <sup>ab</sup>    | 45 <sup>a</sup>    | 6 <sup>b</sup>     | 32 <sup>ab</sup>   | 13 <sup>b</sup>     | 32 <sup>ab</sup>     | 11 <sup>b</sup>    | 14 <sup>b</sup>     |
| <i>SEN3609</i>             | 25 <sup>ab</sup>    | 19 <sup>ab</sup>   | 6 <sup>b</sup>     | 16 <sup>b</sup>    | 40 <sup>a</sup>     | 23 <sup>ab</sup>     | 17 <sup>ab</sup>   | 14 <sup>b</sup>     |
| <i>SEN3651</i>             | 159 <sup>b</sup>    | 203 <sup>b</sup>   | 97 <sup>b</sup>    | 131 <sup>b</sup>   | 568 <sup>a</sup>    | 251 <sup>b</sup>     | 101 <sup>b</sup>   | 216 <sup>b</sup>    |
| <i>SEN3847</i>             | 34 <sup>bc</sup>    | 29 <sup>bc</sup>   | 21 <sup>c</sup>    | 19 <sup>c</sup>    | 60 <sup>a</sup>     | 34 <sup>bc</sup>     | 48 <sup>ab</sup>   | 29 <sup>bc</sup>    |
| <i>SEN3894</i>             | 9 <sup>ab</sup>     | 5 <sup>b</sup>     | 4 <sup>b</sup>     | 3 <sup>b</sup>     | 14 <sup>a</sup>     | 4 <sup>b</sup>       | 10 <sup>ab</sup>   | 5 <sup>b</sup>      |
| <i>SEN4029</i>             | 76 <sup>a</sup>     | 50 <sup>ab</sup>   | 26 <sup>bcd</sup>  | 44 <sup>bc</sup>   | 13 <sup>cd</sup>    | 5 <sup>d</sup>       | 8 <sup>d</sup>     | 6 <sup>d</sup>      |
| <i>suhB</i>                | 5757 <sup>a</sup>   | 82 <sup>c</sup>    | 81 <sup>c</sup>    | 80 <sup>c</sup>    | 3543 <sup>b</sup>   | 150 <sup>c</sup>     | 93 <sup>c</sup>    | 493 <sup>c</sup>    |
| <i>treB</i>                | 586 <sup>b</sup>    | 237 <sup>b</sup>   | 32 <sup>b</sup>    | 112 <sup>b</sup>   | 4409 <sup>a</sup>   | 677 <sup>b</sup>     | 137 <sup>b</sup>   | 983 <sup>b</sup>    |
| <i>uvrC</i>                | 51 <sup>a</sup>     | 10 <sup>bc</sup>   | 24 <sup>bc</sup>   | 7 <sup>c</sup>     | 51 <sup>a</sup>     | 12 <sup>bc</sup>     | 29 <sup>b</sup>    | 6 <sup>c</sup>      |

<sup>1</sup>The mRNA levels are relative to those of *thrA*, which were arbitrarily set at 100. Values are averages of three measurements. Superscripts that are different in each row indicate that the values are different (95% confidence level).

<sup>2</sup>Ent, Enteritidis Nal<sup>R</sup>; Ken, Kentucky 3795. 7 indicates the pH of the TSB medium. 4.5 and 5.5 indicate the pH of the TSB medium after addition of HCl. Ac indicates the addition of acetic acid to achieve a pH of 5.5.

<sup>3</sup>While for all other genes, the assumption was made that amplification efficiency was the same for Enteritidis Nal<sup>R</sup> and Kentucky 3795, and therefore statistical differences were determined across the treatments of both isolates, this assumption could not be made for locus STM1485 since different primers had to be used for qPCR of this locus. Thus, the superscript designations only apply to the columns for Enteritidis Nal<sup>R</sup> and Kentucky 3795, respectively.
